# Supplementary material for: Technical Evaluation of a New Medical Device Based on Rigenase in the Treatment of Chronic Skin Lesions
Source: MDPI journal article supplement (doi:10.3390/bioengineering10091022), 2023-08-29
Supplement: s1 [file s1]

## SUPPLEMENTARY DATA

### Original Research

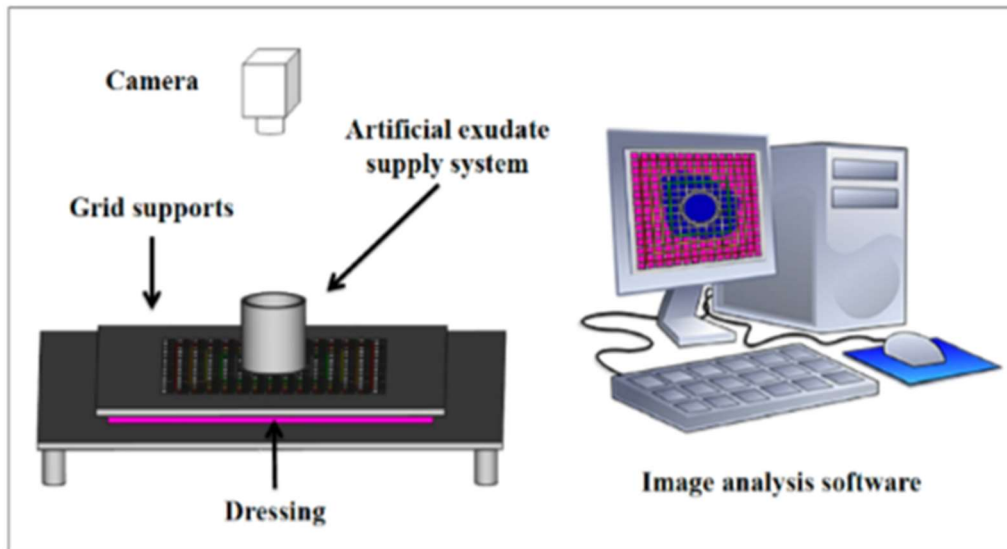

**Supp Fig. S1** Representation of the device reproducing the clinical management of the wound dressing in vitro.

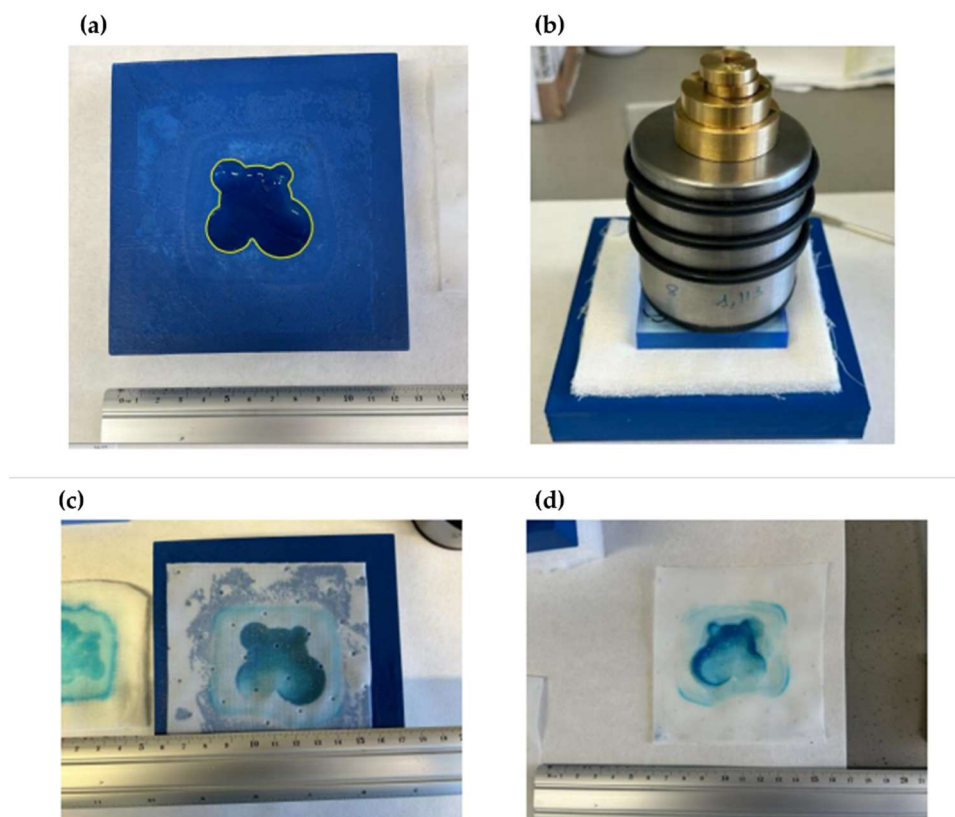

**Supp Fig. S2** In vitro simulation of elastocompressive bandage and dressing of a chronic wound with abundant exudate production. (a) Simulated Lesion (b) lateral diffusion test simulating elastic compression (c) External Lateral Diffusion (d) Internal Lateral Diffusion.
